# Supplementary material for: No male mate choice for female boldness in a bi-parental West African cichlid, the rainbow krib (Pelvicachromis pulcher)
Source: PeerJ. 2018 Aug 9;6:e5373. doi: 10.7717/peerj.5373 (PMC6087618; doi:10.7717/peerj.5373)
Supplement: Data S1 [file peerj-06-5373-s001.xlsx]

## Sheet: boldness test data
sex	ID	standard_length	test_series	predator_specimen	predator_standard_length	test_tank	total_distance_moved_cm	behavioural_consistency	total_distance_moved_cm_mean_over_both_tests	BT_comments
male	m0g0ggg	6.043	1	S1	17.115	Left	524.72	1361.61	1205.53
male	m00g0pg	4.376	1	S1	17.115	Right	87.66	1163.01	669.165
male	mbbb0b0	5.855	1	S2	15.766	Left	181.68	827.58	595.47
male	m0g00gb	5.68	1	S2	15.766	Right	885.13	390.09	1080.17
male	m0pg00p	4.696	1	S3	16.236	Left	797.96	1375.5	1485.71
male	mggg0g0	5.79	1	S3	16.236	Right	473.87	424.78	686.26
male	m00gb0g	4.42	1	S4	15.326	Left	613.44	274.99	750.935
male	m00pgp0	4.564	1	S4	15.326	Right	810.46	648.74	486.09
male	m0g0g0g	4.963	1	S1	17.115	Left	1865.12	952.18	2341.21
male	m000ppg	4.871	1	S1	17.115	Right	451.04	1051.27	976.675
male	m0pp0g0	5.83	1	S2	15.766	Left	806.34	475.49	1044.09
male	m00b0gg	4.661	1	S2	15.766	Right	923.19	712.6	1279.49
male	mpg000p	4.914	1	S3	16.236	Left	370.03	1667.03	1203.55
male	m0bb0p0	4.43	1	S3	16.236	Right	674.25	729.18	1038.84
male	m0gg00b	4.898	1	S4	15.326	Left	152.07	1304.38	804.26
male	m0gb0g0	4.385	1	S4	15.326	Right	297.14	1008.76	801.52
male	m0p0gp0	4.855	1	S1	17.115	Left	115.49	1063.28	647.13
male	m0p00gp	4.588	1	S1	17.115	Right	74.09	1798.28	973.23
male	m0gg0b0	4.563	1	S2	15.766	Left	329.72	344.1	501.77
male	mp000gp	4.906	1	S2	15.766	Right	590.2	429.82	375.29
male	mp000pg	4.637	1	S3	16.236	Left	519.35	22.87	530.785	visual separation in between the focal males and the female observer was not removed
male	m0bg0g0	4.746	1	S3	16.236	Right	1845.29	402.62	1643.98	visual separation in between the focal males and the female observer was not removed
female	f00gp00	4.055	1	S3	15.326	Left	383.61	1396.68	1081.95
female	f00p0pg	4.066	1	S3	15.326	Right	126.66	991.26	622.29
female	fg0g000	4.212	1	S4	17.115	Left	195.68	788.38	589.87
female	f0000pg	4.249	1	S4	17.115	Right	729.9	207.81	625.995
female	f0b000b	4.535	1	S1	15.766	Left	203	628.79	517.395
female	f00g0p0	4.551	1	S1	15.766	Right	2554.38	392.19	2358.28
female	f0p0pp0	4.294	1	S4	16.236	Left	851.45	17.83	860.365
female	f0ppb00	4.345	1	S4	16.236	Right	2060.69	167.12	1977.13
female	f0g0g00	3.931	1	S1	15.326	Left	99.32	304.87	251.755
female	fg0000p	3.967	1	S1	15.326	Right	155.44	301.17	306.025
female	fpp00p0	4.013	1	S2	17.115	Left	1433.69	1017.07	925.155
female	f00p0g0	4.016	1	S2	17.115	Right	1020.1	16.86	1011.67
female	f0p0b0p	4.04	1	S3	15.766	Left	1282.03	338.99	1112.53
female	f0g000g	4.048	1	S3	15.766	Right	184.4	418.61	393.705
female	f0000pb	3.727	1	S2	16.236	Left	984.84	158.24	1063.96
female	f0bp000	3.623	1	S2	16.236	Right	1504.23	325.11	1341.67
female	f00b00g	4.077	1	S4	15.326	Left	993.6	105.97	1046.59
female	f000bp0	4.13	1	S4	15.326	Right	1041.55	83.11	1083.11
female	f00gg00	3.872	1	S2	17.115	Left	44.88	1025.72	557.74
female	f000g0g	3.912	1	S2	17.115	Right	344.25	709.56	699.03
female	f0g00b0	4.134	1	S3	15.766	Left	1862.95	158.15	1783.88
female	f00g00p	4.117	1	S3	15.766	Right	746.49	647.18	1070.08
male	m0g0ggg	6.043	2	S2	17.115	Left	1886.33	1361.61	1205.53
male	m00g0pg	4.376	2	S2	17.115	Right	1250.67	1163.01	669.165
male	mbbb0b0	5.855	2	S3	15.766	Left	1009.26	827.58	595.47
male	m0g00gb	5.68	2	S3	15.766	Right	1275.22	390.09	1080.17
male	m0pg00p	4.696	2	S4	16.236	Left	2173.46	1375.5	1485.71
male	mggg0g0	5.79	2	S4	16.236	Right	898.65	424.78	686.26
male	m00gb0g	4.42	2	S1	15.326	Left	888.43	274.99	750.935
male	m00pgp0	4.564	2	S1	15.326	Right	161.72	648.74	486.09
male	m0g0g0g	4.963	2	S3	17.115	Left	2817.3	952.18	2341.21
male	m000ppg	4.871	2	S3	17.115	Right	1502.31	1051.27	976.675
male	m0pp0g0	5.83	2	S4	15.766	Left	1281.83	475.49	1044.09	visual separation in between the focal males and the female observer was not removed
male	m00b0gg	4.661	2	S4	15.766	Right	1635.79	712.6	1279.49	visual separation in between the focal males and the female observer was not removed
male	mpg000p	4.914	2	S1	16.236	Left	2037.06	1667.03	1203.55
male	m0bb0p0	4.43	2	S1	16.236	Right	1403.43	729.18	1038.84
male	m0gg00b	4.898	2	S2	15.326	Left	1456.45	1304.38	804.26
male	m0gb0g0	4.385	2	S2	15.326	Right	1305.9	1008.76	801.52
male	m0p0gp0	4.855	2	S4	17.115	Left	1178.77	1063.28	647.13
male	m0p00gp	4.588	2	S4	17.115	Right	1872.37	1798.28	973.23
male	m0gg0b0	4.563	2	S1	15.766	Left	673.82	344.1	501.77
male	mp000gp	4.906	2	S1	15.766	Right	160.38	429.82	375.29
male	mp000pg	4.637	2	S2	16.236	Left	542.22	22.87	530.785
male	m0bg0g0	4.746	2	S2	16.236	Right	1442.67	402.62	1643.98
female	f00gp00	4.055	2	S4	15.326	Left	1780.29	1396.68	1081.95
female	f00p0pg	4.066	2	S4	15.326	Right	1117.92	991.26	622.29
female	fg0g000	4.212	2	S3	17.115	Left	984.06	788.38	589.87
female	f0000pg	4.249	2	S3	17.115	Right	522.09	207.81	625.995
female	f0b000b	4.535	2	S2	15.766	Left	831.79	628.79	517.395
female	f00g0p0	4.551	2	S2	15.766	Right	2162.19	392.19	2358.28
female	f0p0pp0	4.294	2	S1	16.236	Left	869.28	17.83	860.365
female	f0ppb00	4.345	2	S1	16.236	Right	1893.57	167.12	1977.13
female	f0g0g00	3.931	2	S2	15.326	Left	404.19	304.87	251.755
female	fg0000p	3.967	2	S2	15.326	Right	456.61	301.17	306.025
female	fpp00p0	4.013	2	S1	17.115	Left	416.62	1017.07	925.155
female	f00p0g0	4.016	2	S1	17.115	Right	1003.24	16.86	1011.67
female	f0p0b0p	4.04	2	S2	15.766	Left	943.04	338.99	1112.53
female	f0g000g	4.048	2	S2	15.766	Right	603.01	418.61	393.705
female	f0000pb	3.727	2	S3	16.236	Left	1143.08	158.24	1063.96
female	f0bp000	3.623	2	S3	16.236	Right	1179.12	325.11	1341.67
female	f00b00g	4.077	2	S2	15.326	Left	1099.57	105.97	1046.59
female	f000bp0	4.13	2	S2	15.326	Right	1124.66	83.11	1083.11
female	f00gg00	3.872	2	S4	17.115	Left	1070.6	1025.72	557.74
female	f000g0g	3.912	2	S4	17.115	Right	1053.81	709.56	699.03
female	f0g00b0	4.134	2	S1	15.766	Left	1704.8	158.15	1783.88
female	f00g00p	4.117	2	S1	15.766	Right	1393.67	647.18	1070.08
male	mpp0p0p	6.029	1	S1	17.115	Left	635.83	830.2	1050.93
male	m000bgg	4.345	1	S1	17.115	Right	870.32	159.4	950.02
male	m000ggb	5.109	1	S2	15.766	Left	264.59	1289.57	909.375
male	m00gbg0	5.263	1	S2	15.766	Right	856.74	869.17	1291.33
male	mg0gg0g	5.982	1	S3	16.236	Left	1053.69	881.31	1494.35
male	mg000bg	4.618	1	S3	16.236	Right	688.65	778.18	1077.74
male	m0g00bb	5.26	1	S4	15.326	Left	253.45	310.42	408.66	visual separation in between the focal males and the female observer was not removed
male	m0g0gb0	4.97	1	S4	15.326	Right	1471.39	711.61	1115.59	visual separation in between the focal males and the female observer was not removed
male	m00p0bp	5.113	1	S1	17.115	Left	383.26	747.26	756.89
male	mb0g00g	5.369	1	S1	17.115	Right	66.73	1385.35	759.405
male	mg0gb00	4.896	1	S2	15.766	Left	939.7	95.39	987.395
male	m0gb00b	4.692	1	S2	15.766	Right	194.52	595.5	492.27
male	m0ggb00	5.041	1	S3	16.236	Left	347.25	876.5	785.5
male	mb0bb0b	6.105	1	S3	16.236	Right	260.35	590.56	555.63
male	mg0g00b	4.858	1	S4	15.326	Left	354.88	645.35	677.555
male	mbb00p0	5.514	1	S4	15.326	Right	558.3	784.74	950.67
male	m00gg0b	5.348	1	S1	17.115	Left	572.76	1526.27	1335.89
male	mg000bb	5.28	1	S1	17.115	Right	241.48	858.17	670.565
male	m0b00gg	4.728	1	S2	15.766	Left	626.7	78.57	665.985
male	mggb000	4.813	1	S2	15.766	Right	471.27	137.66	540.1
male	m0g00bg	5.302	1	S3	16.236	Left	133.81	507.49	387.555
male	m0g0g0b	4.167	1	S3	16.236	Right	116.73	875.38	554.42
female	f000bg0	3.699	1	S3	15.326	Left	129.07	649.66	453.9
female	f0g000p	3.703	1	S3	15.326	Right	180.65	1075.74	718.52
female	f0b0b00	3.86	1	S4	17.115	Left	683.21	561.09	402.665
female	f0g0p00	3.881	1	S4	17.115	Right	253.86	260.18	383.95
female	f00b0p0	3.542	1	S1	15.766	Left	77.61	662.07	408.645
female	f00p0b0	3.551	1	S1	15.766	Right	21.93	720.43	382.145
female	f0gb000	4.321	1	S4	16.236	Left	3356.15	1332.74	2689.78
female	f00pb00	4.327	1	S4	16.236	Right	1911.98	256.21	2040.09
female	f000p0b	3.713	1	S1	15.326	Left	143.92	24.77	156.305
female	f00p00b	3.73	1	S1	15.326	Right	86.59	246.42	209.8
female	f00g0gp	3.414	1	S2	17.115	Left	70.56	159.42	150.27
female	f0p0b00	3.503	1	S2	17.115	Right	302.76	5.5	300.01
female	f000g0p	3.965	1	S3	15.766	Left	136.07	260.61	266.375
female	fg0b000	4.007	1	S3	15.766	Right	846.3	459.26	1075.93
female	f00g0b0	3.735	1	S2	16.236	Left	104.21	6.82	107.62
female	f000pg0	3.742	1	S2	16.236	Right	37.54	44.62	59.85
female	f0p000g	3.834	1	S4	15.326	Left	39.77	359.13	219.335
female	f0g0b00	3.851	1	S4	15.326	Right	629.65	614.65	936.975
female	f0pb000	4.494	1	S2	17.115	Left	1319.04	24.86	1306.61
female	fb00g00	4.543	1	S2	17.115	Right	1500.86	38.67	1481.53
female	f0bg000	3.705	1	S3	15.766	Left	114.2	21.2	124.8
female	fb0000b	3.71	1	S3	15.766	Right	186.68	352.16	362.76
male	mpp0p0p	6.029	2	S2	17.115	Left	1466.03	830.2	1050.93
male	m000bgg	4.345	2	S2	17.115	Right	1029.72	159.4	950.02
male	m000ggb	5.109	2	S3	15.766	Left	1554.16	1289.57	909.375
male	m00gbg0	5.263	2	S3	15.766	Right	1725.91	869.17	1291.33
male	mg0gg0g	5.982	2	S4	16.236	Left	1935	881.31	1494.35
male	mg000bg	4.618	2	S4	16.236	Right	1466.83	778.18	1077.74
male	m0g00bb	5.26	2	S1	15.326	Left	563.87	310.42	408.66
male	m0g0gb0	4.97	2	S1	15.326	Right	759.78	711.61	1115.59
male	m00p0bp	5.113	2	S3	17.115	Left	1130.52	747.26	756.89
male	mb0g00g	5.369	2	S3	17.115	Right	1452.08	1385.35	759.405
male	mg0gb00	4.896	2	S4	15.766	Left	1035.09	95.39	987.395
male	m0gb00b	4.692	2	S4	15.766	Right	790.02	595.5	492.27
male	m0ggb00	5.041	2	S1	16.236	Left	1223.75	876.5	785.5
male	mb0bb0b	6.105	2	S1	16.236	Right	850.91	590.56	555.63
male	mg0g00b	4.858	2	S2	15.326	Left	1000.23	645.35	677.555
male	mbb00p0	5.514	2	S2	15.326	Right	1343.04	784.74	950.67
male	m00gg0b	5.348	2	S4	17.115	Left	2099.03	1526.27	1335.89
male	mg000bb	5.28	2	S4	17.115	Right	1099.65	858.17	670.565
male	m0b00gg	4.728	2	S1	15.766	Left	705.27	78.57	665.985
male	mggb000	4.813	2	S1	15.766	Right	608.93	137.66	540.1
male	m0g00bg	5.302	2	S2	16.236	Left	641.3	507.49	387.555
male	m0g0g0b	4.167	2	S2	16.236	Right	992.11	875.38	554.42
female	f000bg0	3.699	2	S4	15.326	Left	778.73	649.66	453.9
female	f0g000p	3.703	2	S4	15.326	Right	1256.39	1075.74	718.52
female	f0b0b00	3.86	2	S3	17.115	Left	122.12	561.09	402.665
female	f0g0p00	3.881	2	S3	17.115	Right	514.04	260.18	383.95
female	f00b0p0	3.542	2	S2	15.766	Left	739.68	662.07	408.645
female	f00p0b0	3.551	2	S2	15.766	Right	742.36	720.43	382.145
female	f0gb000	4.321	2	S1	16.236	Left	2023.41	1332.74	2689.78
female	f00pb00	4.327	2	S1	16.236	Right	2168.19	256.21	2040.09
female	f000p0b	3.713	2	S2	15.326	Left	168.69	24.77	156.305
female	f00p00b	3.73	2	S2	15.326	Right	333.01	246.42	209.8
female	f00g0gp	3.414	2	S1	17.115	Left	229.98	159.42	150.27
female	f0p0b00	3.503	2	S1	17.115	Right	297.26	5.5	300.01
female	f000g0p	3.965	2	S2	15.766	Left	396.68	260.61	266.375
female	fg0b000	4.007	2	S2	15.766	Right	1305.56	459.26	1075.93
female	f00g0b0	3.735	2	S3	16.236	Left	111.03	6.82	107.62
female	f000pg0	3.742	2	S3	16.236	Right	82.16	44.62	59.85
female	f0p000g	3.834	2	S2	15.326	Left	398.9	359.13	219.335
female	f0g0b00	3.851	2	S2	15.326	Right	1244.3	614.65	936.975
female	f0pb000	4.494	2	S4	17.115	Left	1294.18	24.86	1306.61
female	fb00g00	4.543	2	S4	17.115	Right	1462.19	38.67	1481.53
female	f0bg000	3.705	2	S1	15.766	Left	135.4	21.2	124.8
female	fb0000b	3.71	2	S1	15.766	Right	538.84	352.16	362.76
